# Supplementary material for: Ag NP-filter paper based SERS sensor coupled with multivariate analysis for rapid identification of bacteria
Source: Royal Society of Chemistry journal article supplement (doi:10.1039/d2ra05715h), 2022-12-21
Supplement: d2ra05715h1.pdf [file d2ra05715h1.pdf]

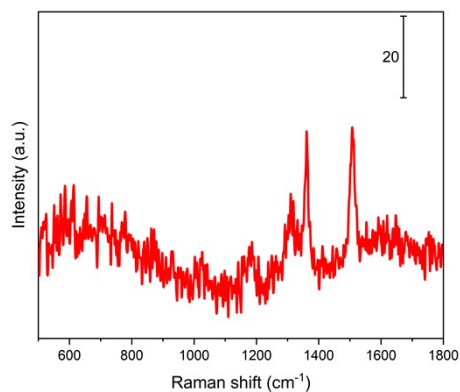

Fig S1. Raman spectra of R6G with a concentration of  $10^{-2}$  M .

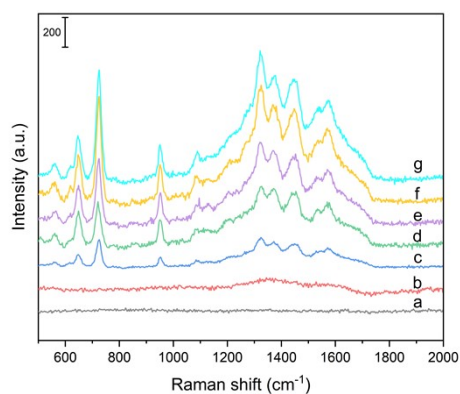

Fig.S2. SERS spectra of blank Ag NPs-filter paper substrate (a), Raman spectra of *S.aureus*(b) and SERS spectra of *S.aureus* with concentration of  $10^2$  CFU/mL(c),  $10^3$  CFU/mL(d),  $10^4$  CFU/mL(e),  $10^5$  CFU/mL(f),  $10^6$  CFU/mL(g).

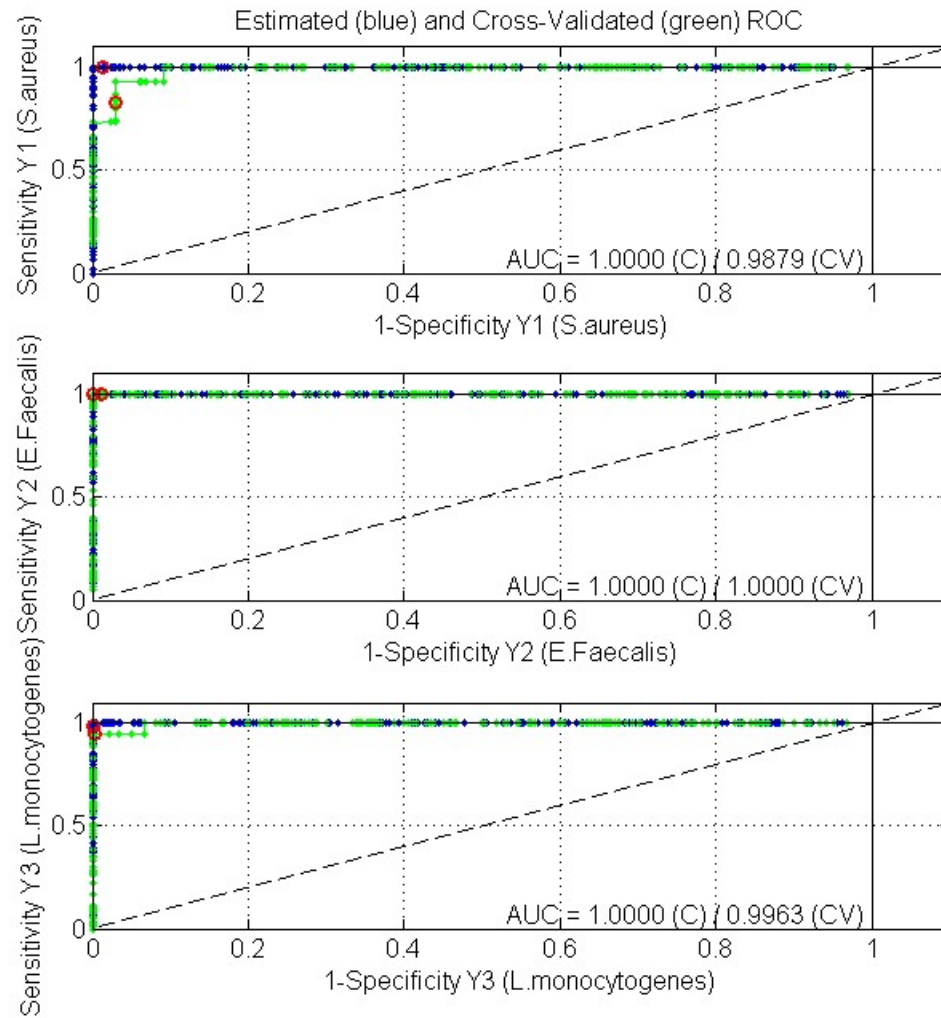

Fig.S3. ROC curves of discrimination results for three bacterial species generated from the PLS-DA analysis.
